# Supplementary material for: First-Year Implementation of the EXercise for Cancer to Enhance Living Well (EXCEL) Study: Building Networks to Support Rural and Remote Community Access to Exercise Oncology Resources
Source: MDPI journal article supplement (doi:10.3390/ijerph20031930), 2023-01-20
Supplement: s1 [file s1]

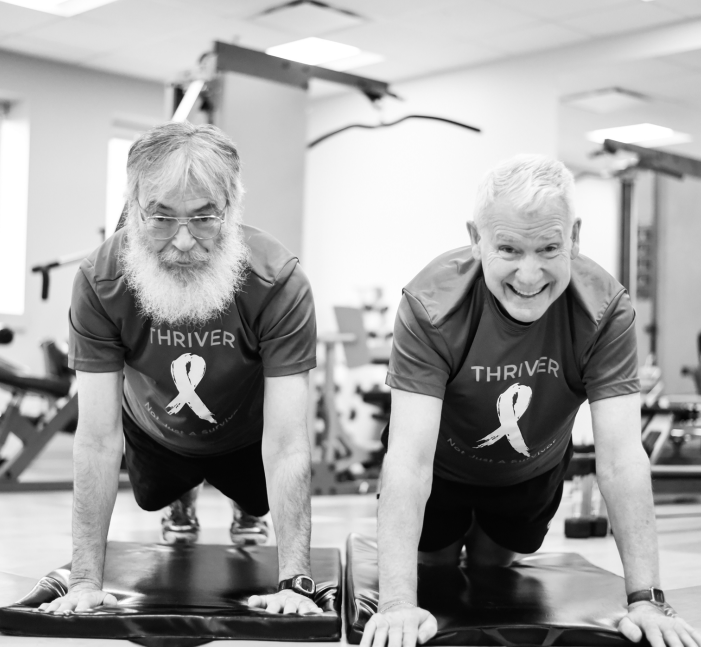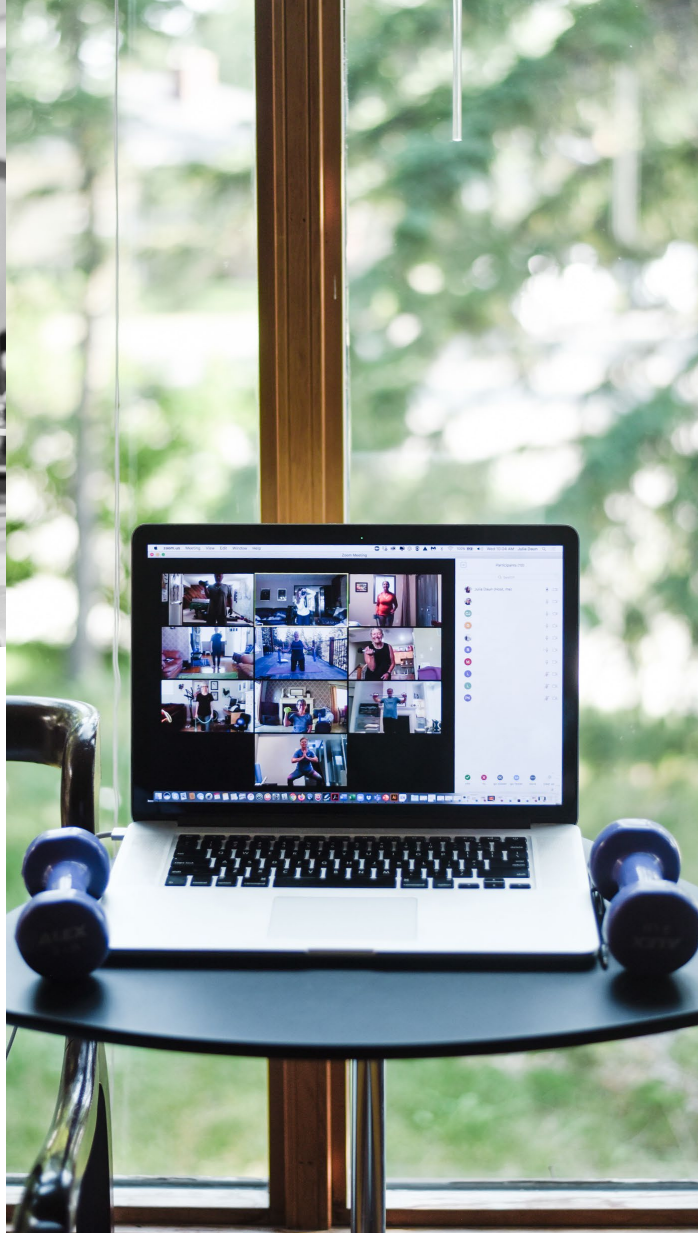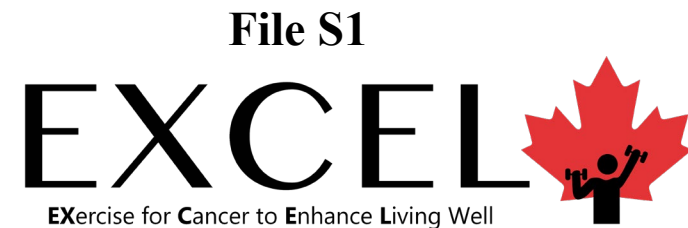

EXCEL is the **EX**ercise for **C**ancer to **E**nhance **L**iving **W**ell study. This study provides an exercise program to Canadians living with and beyond cancer.

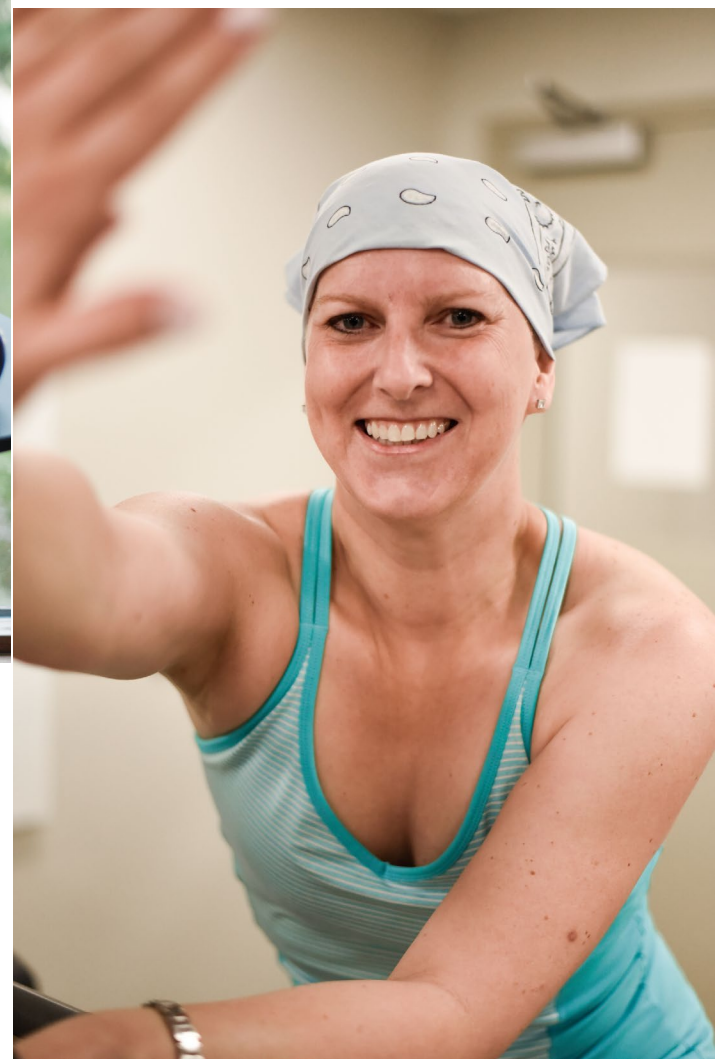

## CONTACT INFORMATION

*Health & Wellness Lab:*

E: [wellnesslab@ucalgary.ca](mailto:wellnesslab@ucalgary.ca)

Ph: 403-210-8482

Web:  
[thriveforcancersurvivors.com/](http://thriveforcancersurvivors.com/)

Please get in touch to learn more.

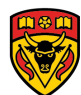

**UNIVERSITY OF CALGARY**  
FACULTY OF KINESIOLOGY  
Health and Wellness Lab

*Funding for this study provided by:*

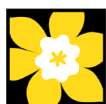

Canadian  
Cancer  
Society

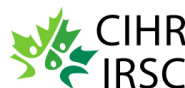

Canadian Institutes of  
Health Research  
Instituts de recherche  
en santé du Canada

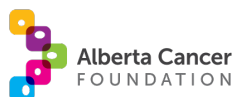

This study has been approved by the Health Research  
Ethics Board of Alberta: HREBA.CC-20.0098

Version date: June 9, 2022, V3

# BENEFITS OF EXERCISE:

## PHYSICAL:

-  Decreases fatigue
-  Improves physical function
-  Improves ability to do activities of daily living

## PSYCHOSOCIAL:

-  Boosts energy and mood
-  Enhances sleep
-  Increases emotional & social well-being

# ELIGIBILITY

To be eligible, participants must:

- Have/had a cancer diagnosis
- Be pre-cancer treatment, receiving treatment, or within 3 years treatment completion
- Able to participate in mild/moderate physical activity
- 18+ yrs old and able to consent in English

# STUDY ASSESSMENTS

Participants will complete a fitness assessment before and after the exercise program. Each assessment will take approximately 30 minutes, will be assessed either in-person or online through a secure video-conference platform, and will include:

- Medical history and demographic information.
- 6-minute walk test or 2-minute step test to assess aerobic fitness
- Muscular endurance tests
- Core and shoulder flexibility test
- A standing balance test
- Height and weight measurements
- Questionnaires to assess individual symptoms, quality of life, and physical activity levels. Questionnaires will be completed at baseline, after the exercise program, 24-weeks, at 1 year, and annually for up to 5 years.

# FAQ

## HOW LONG IS THIS STUDY?

Participation in this study includes an 8 to 12-week exercise program (depending on the program offered in your area), two fitness assessments, a series of questionnaires completed four times throughout the year, and follow-up questionnaires annually for up to 5 years.

## HOW MUCH DOES IT COST?

There is no cost associated with enrollment in this study; however, participating at some partnering facilities may result in indirect costs such as parking fees.

## WHAT ELSE SHOULD I KNOW?

If you would like to know more about the EXCEL study as a potential participant, please email or call the EXCEL team (see contact information).

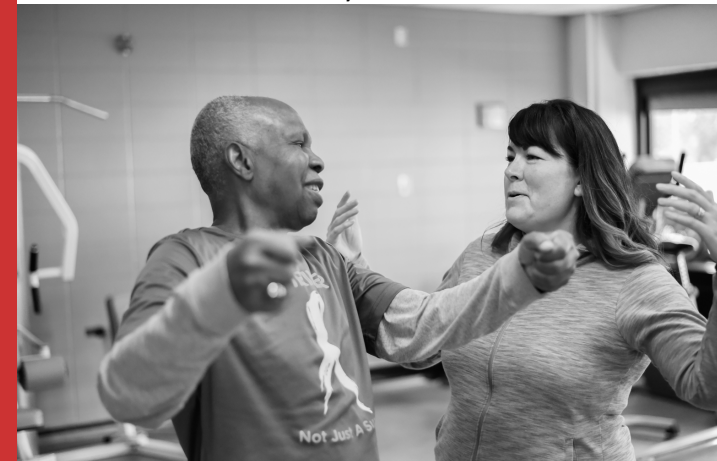



# EXCEL

**EX**ercise for **C**ancer to **E**nhance **L**iving Well

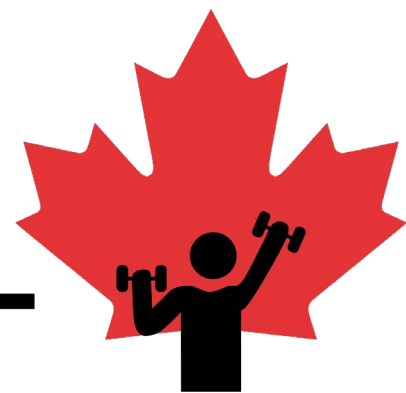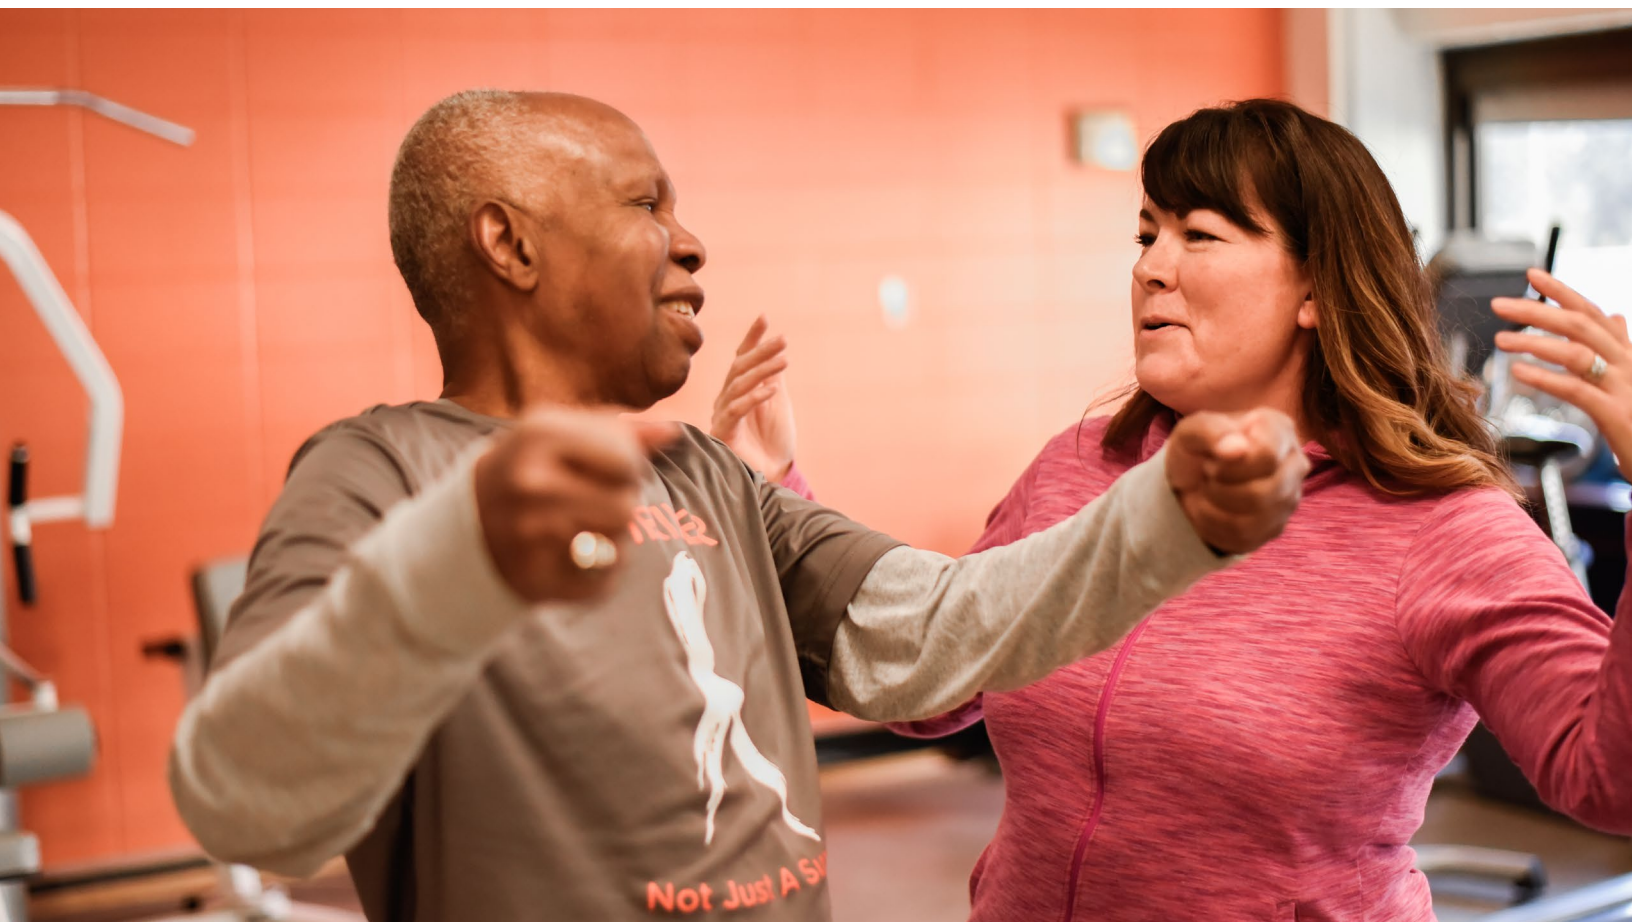

## Feeling FATIGUED?

Boost your **ENERGY** by joining this **FREE** cancer exercise study

### For more information:

Email us at: [wellnesslab@ucalgary.ca](mailto:wellnesslab@ucalgary.ca)

Call us at: 403-210-8482

Website: [thriveforcancersurvivors.com/](http://thriveforcancersurvivors.com/)

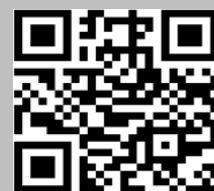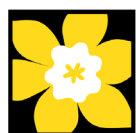

Canadian  
Cancer  
Society

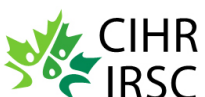

Canadian Institutes of  
Health Research  
Instituts de recherche  
en santé du Canada

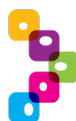

Alberta Cancer  
FOUNDATION

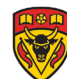

UNIVERSITY OF CALGARY  
FACULTY OF KINESIOLOGY  
Health and Wellness Lab

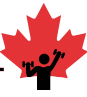

### Physical Activity Screening Form

#### Patient Label

Last Name: \_\_\_\_\_  
 First Name: \_\_\_\_\_  
 Address: \_\_\_\_\_  
 City: \_\_\_\_\_  
 Province: \_\_\_\_\_  
 Postal Code: \_\_\_\_\_  
 Email: \_\_\_\_\_  
 Home Phone Number: \_\_\_\_\_  
 Work Phone Number: \_\_\_\_\_  
 Cell Phone Number: \_\_\_\_\_  
 Gender: \_\_\_\_\_  
 Date of Birth: \_\_\_\_\_  
 Personal Health Number: \_\_\_\_\_

#### Current Side Effects:

|                                                |                                                    |
|------------------------------------------------|----------------------------------------------------|
| <input type="checkbox"/> Cardiotoxicity        | <input type="checkbox"/> Thrombocytopenia          |
| <input type="checkbox"/> Pulmonary function    | <input type="checkbox"/> Peripheral neuropathy     |
| <input type="checkbox"/> Fatigue               | <input type="checkbox"/> Decreased range of motion |
| <input type="checkbox"/> Bowel/bladder changes | <input type="checkbox"/> Bone or joint issues      |
| <input type="checkbox"/> Neutropenia           | <input type="checkbox"/> Lymphedema                |
| <input type="checkbox"/> Anemia                | <input type="checkbox"/> Skin changes              |

#### Other (please indicate below):

#### Additional Comments:

#### Patient Information:

Please indicate any significant co-morbidities [that could affect exercise participation]:

Is the cancer metastatic? If so, please provide the locations and stability of metastases.

#### Physical Activity Clearance:

- ☐ No physical activity at this time  
☐ Under supervision of qualified exercise professional  
☐ Unrestricted or progressive physical activity

☐ Modification(s) for exercise (if applicable):

|                             |               |              |
|-----------------------------|---------------|--------------|
| <b>Physician Signature:</b> | <b>Stamp:</b> | <b>Date:</b> |
|-----------------------------|---------------|--------------|

| Variable                                       | Rural / Remote (n=199) | Urban (n=37) |
|------------------------------------------------|------------------------|--------------|
| Age (years) <sup>†</sup>                       | 58.1 (12.1)            | 54.2 (9.9)   |
| Province                                       |                        |              |
| Alberta                                        | 113 (56.8)             | 0 (0.0)      |
| Nova Scotia                                    | 58 (29.1)              | 2 (5.4)      |
| Ontario                                        | 28 (14.1)              | 35 (94.6)    |
| Sex                                            |                        |              |
| Female                                         | 158 (79.8)             | 34 (94.4)    |
| Male                                           | 40 (20.2)              | 2 (5.6)      |
| Ancestral Ethnicity                            |                        |              |
| Aboriginal                                     | 4 (2.0)                | 0 (0.0)      |
| Asian                                          | 7 (3.5)                | 7 (18.9)     |
| British                                        | 70 (35.2)              | 11 (29.7)    |
| Caribbean                                      | 1 (0.5)                | 0 (0.0)      |
| European                                       | 65 (32.7)              | 7 (18.9)     |
| Latin / Central and South America              | 4 (2.0)                | 2 (5.4)      |
| Multi-ethnic                                   | 33 (16.6)              | 5 (13.5)     |
| No information provided                        | 15 (7.5)               | 5 (13.5)     |
| Education                                      |                        |              |
| High school or less                            | 25 (12.6)              | 0 (0.0)      |
| More than high school                          | 173 (87.4)             | 36 (100.0)   |
| Employment Status                              |                        |              |
| Full Time                                      | 32 (16.2)              | 9 (36.0)     |
| Part Time                                      | 26 (13.1)              | 5 (13.9)     |
| Retired                                        | 78 (39.4)              | 7 (19.4)     |
| Homemaker                                      | 8 (4.0)                | 0 (0.0)      |
| Disability                                     | 45 (22.7)              | 11 (30.6)    |
| Temporarily Unemployed                         | 9 (4.5)                | 4 (11.1)     |
| Marital Status                                 |                        |              |
| Not Married                                    | 44 (22.2)              | 11 (30.6)    |
| Married                                        | 133 (67.2)             | 19 (52.8)    |
| Common Law                                     | 21 (10.6)              | 6 (16.6)     |
| Cancer Type                                    |                        |              |
| Breast                                         | 103 (51.8)             | 23 (62.2)    |
| Lung                                           | 15 (7.5)               | 5 (13.5)     |
| Hematologic                                    | 19 (9.5)               | 0 (0.0)      |
| Gynecological                                  | 11 (5.5)               | 5 (13.5)     |
| Prostate                                       | 15 (7.5)               | 1 (2.7)      |
| Skin                                           | 5 (2.5)                | 1 (2.7)      |
| Brain                                          | 5 (2.5)                | 1 (2.7)      |
| Colon                                          | 6 (3.0)                | 0 (0.0)      |
| Head and Neck                                  | 5 (2.5)                | 0 (0.0)      |
| Other <sup>‡</sup>                             | 15 (7.5)               | 1 (2.7)      |
| Advanced Cancer                                |                        |              |
| Yes                                            | 54 (27.3)              | 10 (27.8)    |
| No                                             | 144 (72.7)             | 26 (72.2)    |
| Treatment Status                               |                        |              |
| On                                             | 107 (54.0)             | 21 (58.3)    |
| Off                                            | 91 (46.0)              | 15 (41.7)    |
| Treatment Type for participants 'On' treatment |                        |              |
| Chemotherapy                                   | 30 (28.0)              | 3 (14.3)     |
| Radiation                                      | 5 (4.7)                | 0 (0.0)      |
| Hormone Therapy                                | 44 (41.1)              | 8 (38.1)     |
| Combination*                                   | 14 (13.1)              | 2 (9.5)      |
| Other**                                        | 14 (13.1)              | 8 (38.1)     |

<sup>†</sup> = Age is expressed as mean (standard deviation)

<sup>‡</sup> Other = bladder, appendiceal, kidney, pancreatic, small bowel, colorectal, gastric, rectal, esophagus

\*Combination = any combination of chemotherapy, radiation, hormone therapy, or "other"

\*\*Other = immunotherapy, targeted therapy, surgery, antimetabolites

## Rural / Remote vs Urban Implementation Summary

| Variable                            | Rural / Remote | Urban  |
|-------------------------------------|----------------|--------|
| <b><i>Reach (n)</i></b>             |                |        |
| Enrolled Participants               | 199            | 37     |
| Direct HCP-Referral                 | 19             | 1      |
| Indirect HCP Referral               | 36             | 1      |
| Self-Referral                       | 144            | 35     |
| <b><i>Implementation (%)</i></b>    |                |        |
| Exercise Intervention Adherence     | 78.3%          | 77.8%  |
| Fitness Assessment Completion       |                |        |
| Baseline                            | 98.0%          | 100.0% |
| 12-week                             | 91.5%          | 81.1%  |
| Patient-Reported Outcome Completion |                |        |
| Baseline                            | 97.5%          | 91.9%  |
| 12-week                             | 86.4%          | 94.6%  |

# Rural / Remote vs Urban Referral Sources

| Referral Resource Descriptions                 | Number of times resources were indicated |              |
|------------------------------------------------|------------------------------------------|--------------|
|                                                | Rural / Remote (n=199)                   | Urban (n=37) |
| <i><u>Word of Mouth</u></i>                    |                                          |              |
| Friend or Family Member                        | 2                                        | 1            |
| Previous or Current Participant                | 21                                       | 0            |
| Support Group                                  | 32                                       | 2            |
| Health and Wellness Organizations and Programs | 49                                       | 27           |
| <i><u>EXCEL Team Outreach</u></i>              |                                          |              |
| Online Presentations                           | 1                                        | 0            |
| Social Media or Websites                       | 18                                       | 4            |
| Study Staff                                    | 26                                       | 1            |
| <i><u>Healthcare Provider</u></i>              |                                          |              |
| Social Worker                                  | 1                                        | 0            |
| Lymphedema Specialist                          | 1                                        | 0            |
| HCP provided brochure in clinic                | 3                                        | 0            |
| Patient Navigator                              | 3                                        | 0            |
| Care Coordinator                               | 3                                        | 0            |
| Primary Care Network                           | 5                                        | 0            |
| Oncologist                                     | 15                                       | 1            |
| Nurse                                          | 16                                       | 0            |
| <i><u>Print Materials</u></i>                  |                                          |              |
| Posters                                        | 3                                        | 0            |
| Brochures                                      | 5                                        | 0            |

\* = participants could indicate multiple referral resources if they chose to answer the question "How did you first find out about the EXCEL program?"

Supplemental Table 1: HCP Network Organizations (n = 163)

| <b>Alberta (n=55)</b>                               | <b>Nova Scotia (n=21)</b>                     | <b>Ontario (n=87)</b>                                       |
|-----------------------------------------------------|-----------------------------------------------|-------------------------------------------------------------|
| 1. Alberta Heartland PCN                            | 1. Cumberland Regional Health Center          | 1. Anson General                                            |
| 2. Aspen PCN                                        | 2. Antigonish Cancer Centre                   | 2. Atikokan General Hospital                                |
| 3. Barrhead Cancer Centre                           | 3. Bridgewater Hospital                       | 3. Bingham Memorial Hospital                                |
| 4. Beaumont Family Medical Associates               | 4. Charlotte County Oncology                  | 4. Blanche River Health                                     |
| 5. Big Country PCN                                  | 5. Community Health Team<br>Bedford/Sackville | 5. Blue Water Health                                        |
| 6. Bighorn PCN                                      | 6. Hants Health & Wellness Team               | 6. Brampton Civic Hospital                                  |
| 7. Bonnyville Cancer Centre                         | 7. Labrador Health Centre                     | 7. Brantford General Hospital                               |
| 8. Bonnyville PCN                                   | 8. Living Beyond Cancer                       | 8. Cambridge Memorial Hospital                              |
| 9. Bow Valley Cancer Centre                         | 9. Nova Scotia Health Authority               | 9. Cancer Centre of Southeastern Ontario                    |
| 10. Bow Valley PCN                                  | 10. St John Regional Oncology                 | 10. Central Regional Cancer Program                         |
| 11. Bow Valley PCN                                  | 11. Colchester Easts Hants Health Center      | 11. Credit Valley Hospital                                  |
| 12. Calgary Rural Primary Care Network (High River) | 12. Cape Breton Cancer Center                 | 12. Department of Women's and Children's Health             |
| 13. Calgary Rural Primary Care Network (Strathmore) | 13. Westside Medical Center                   | 13. Dryden Regional Health Centre - Rehabilitation Services |
| 14. Camrose Cancer Centre                           | 14. Aberdeen Hospital                         | 14. Durham Regional Cancer Centre                           |
| 15. Camrose PCN                                     | 15. Valley Regional Hospital                  | 15. Emily Anderson Memorial Menoyawin Health Centre         |
| 16. Care Plus Medical Clinic                        | 16. Colchester Community Hospital             | 16. Espanola Regional Health Center                         |
| 17. Chinook PCN                                     | 17. East Hants Medical Center                 | 17. Gateway Centre of Excellence in Rural Health            |
| 18. Cold Lake PCN                                   | 18. South Shore Regional Hospital             | 18. Grand River Regional Cancer Centre                      |
| 19. Drayton Valley Cancer Centre                    | 19. Nova Scotia Cancer Center                 | 19. Grey Bruce Health Services                              |
| 20. Drayton Valley PCN                              | 20. Cancer Care Nova Scotia                   | 20. Headwaters Specialist Clinic                            |
| 21. Drumheller Cancer Centre                        | 21. Wolfville Professional Center             | 21. Health Sciences North Cancer Centre                     |
| 22. Edmonton Southside PCN                          |                                               | 22. Health Sciences North Regional Cancer Program           |
| 23. Grande Prairie Cancer Centre                    |                                               | 23. Home and Community Care Support Services                |
| 24. High River Cancer Centre                        |                                               | 24. Hopital Notre-Dame Hospital Physio                      |
| 25. Highland PCN                                    |                                               | 25. Javinski Cancer Centre                                  |
| 26. Hinton Cancer Centre                            |                                               | 26. Joseph Brant Hospital Cancer Clinic                     |



27. Jack Ady Cancer Centre
28. Kalya PCN
29. Lakeland PCN
30. Lamont Office
31. Leduc Beaumont Devon PCN
32. Lloyd PCN
33. Lloydminster Community Cancer Centre
34. Margery E. Yuill Cancer Centre
35. McLeod River PCN
36. Northwest PCN
37. Palliser PCN
38. Prostate Cancer Centre
39. Peace River Cancer Centre
40. Peace River PCN
41. Peaks to Prairie PCN
42. Peter Lougheed Centre
43. Provst PCN
44. Red Deer PCN
45. Redwater Office
46. Rocky Mountain House PCN
47. Saddle Hills PCN
48. Sherwood Park Strathcona Country PCN
49. St Alberta and Sturgeon PCN
50. Tom Baker Cancer Centre
51. Wainwright PCN
52. WestView PCN
53. Wetaskiwin PCN
54. Wolf Creek PCN
55. Wood Buffalo PCN

27. Juravinski Cancer Centre
28. Kasabonika Lake First Nation
29. Kenora Physiotherapy & Sports Injury Clinic
30. Kingston General Hospital
31. Kingston Health Sciences Centre
32. Kitchenuhmaykoosib Inninuwug - Nursing Station
33. Lady Dunn Health Centre
34. Lake of the Woods District Hospital
35. Lakeridge Health
36. Lakeridge Health Corporation
37. Lakeridge Health Oshawa
38. LHSC London Regional Cancer Program
39. London Health Sciences Centre
40. London Regional Cancer Centre
41. Lyrette Physiotherapy
42. Mackenzie Health
43. Mackenzie Richmond Hill Hospital
44. Manitoulin Health Centre
45. Markham Stouffville Hospital
46. Mary Berglund Community Health Centre
47. Mattawa Hospital Physio
48. MICS Groups of Health Services
49. Mississauga First Nation – Red Pine Lodge
50. Nellie Fiddler Memorial Health Centre
51. Northeast Cancer Centre
52. Ottawa General Hospital
53. Ottawa Hospital Cancer Centre
54. Peel Regional Cancer Centre
55. Queensway Health Center Site

56. Resilience Physiotherapy
57. Rouge Valley Centerary Hospital
58. Royal Victoria Hospital
59. Royal Victoria Regional Health Centre
60. RSM Durham Regional Cancer Centre
61. Sault Area Hospital
62. Saulte Ste Marie Academic Medical Association
63. Scarborough Grace Hospital
64. Scarborough Health Network
65. Sensenbrenner Hospital
66. Simcoe Muskoka Regional Cancer Program
67. Sioux Lookout Meno Ya Min Health Centre
68. Southlake Regional Health Centre
69. St. Joseph's General Hospital
70. St. Joseph's Health Centre
71. Stronach Regional Cancer Centre
72. Sunnybrook Odette Cancer Centre
73. The Credit Valley Hospital
74. The Ottawa Hospital
75. The Ottawa Hospital Cancer Centre
76. Thunder Bay Regional Health Centre
77. Timmins and District Hospital
78. Trillium Health Partners
79. Trillium Health Partners - Credit Valley Site
80. Trillium Health Partners Oncology
81. University Health Network
82. Walker Family Cancer Centre
83. Weeneebayko General Hospital Physio
84. William Osler Health System

85. Wilson Memorial General Hospital
86. Windsor Regional Cancer Centre
87. Wright Physiotherapy
